# Supplementary material
Source: PubMed Central journal article supplement (PMC4433410)
Supplement: NIHMS673755-supplement-SUPPLEMENTAL.pdf [file NIHMS673755-supplement-SUPPLEMENTAL.pdf]

SUPPLEMENTARY MATERIAL

Transcription of *Nrdp1* by the androgen receptor is regulated by nuclear Filamin A in prostate cancer

**Supplementary Figure 1. Nrdp1 Antibody Characterization.** 293T HEK cells were transfected with control or Nrdp1 shRNA to show the specificity of a rabbit polyclonal anti-Nrdp1 antibody. **(A)** Western blot analysis showed Nrdp1 staining as a 36 KDa band. Specificity of the band was determined by knockdown of Nrdp1 upon shRNA use, and a corresponding increase of p-ErbB3. 293T HEK cells were grown in FBS media. Cell lysates were immunoblotted with anti-Nrdp1, anti-p-Erb3 and anti-tubulin antibodies. **(B)** 293T HEK cell pellets (similarly treated) were paraffin embedded, sectioned and stained with the same Nrdp1 antibody. Lack of background staining in the shRNA-treated cells denotes that the IHC staining was more specific.

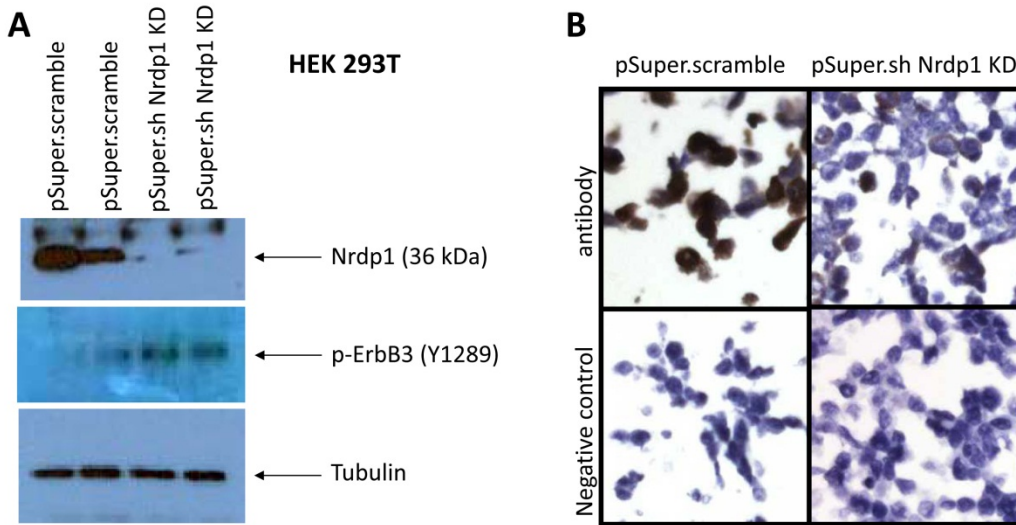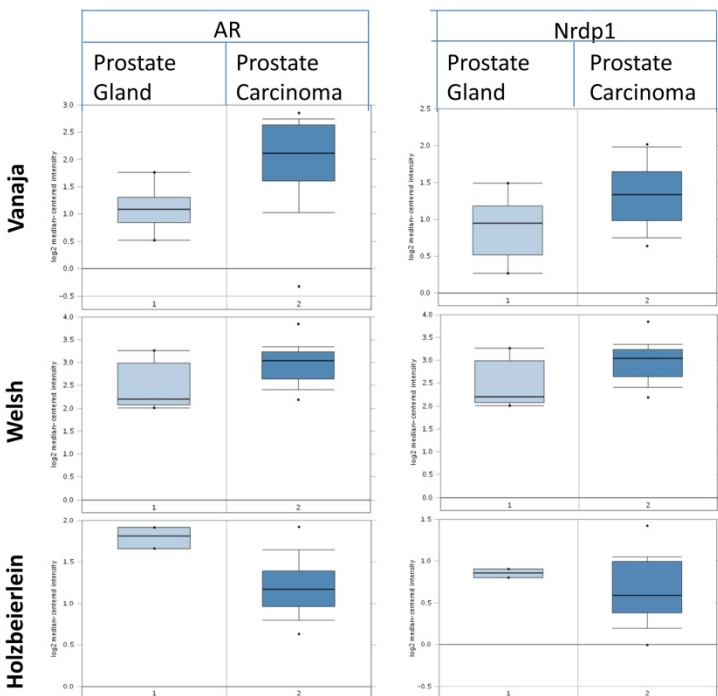

**Supplementary Figure 2. AR and Nrdp1 expression in cancer and normal cells.**

Confirmation of the up regulation of Nrdp1 and AR in cancer vs. normal prostate and the correlation between three Oncomine datasets. (For AR,  $p = 3.26 \times 10^{-8}$ ; for Nrdp1,  $p = 1.62 \times 10^{-6}$ ; values calculated using Fisher's combined probability test). Box plots shown are from studies in the Oncomine database representative of overall trend. Note that Nrdp1 levels correspond to AR values.

**Supplementary Figure 3. Nrdp1 ARE.03 Genomic Sequence is not different in LNCaP and C4-2 cells despite altered AR binding.** Nucleotide comparison of the Nrdp1 ARE.03 sequence in LNCaP and C4-2 showing no mutation in the sequence despite a change in AR binding in the two cell lines.

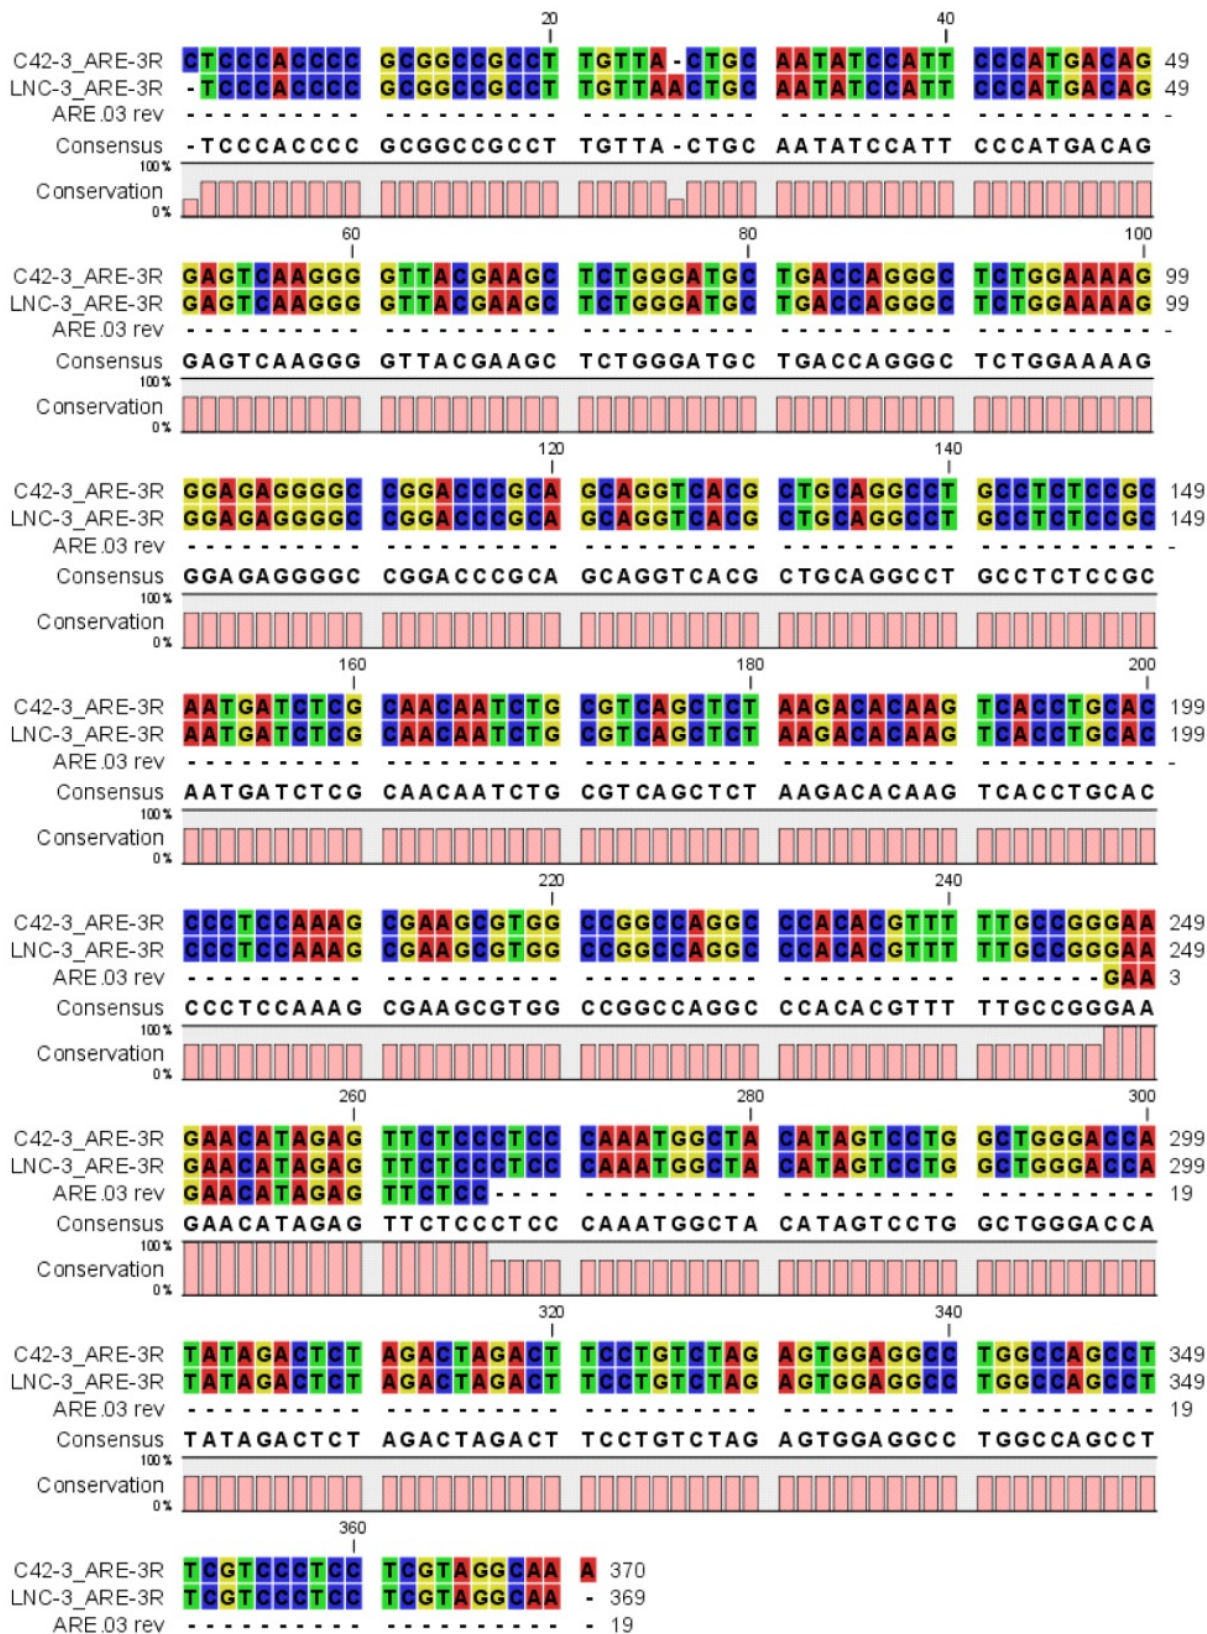

**Supplementary Figure 4. Localization of FlnA expression in PCa cells. (upper panel)** LNCaP and C4-2 cells were cultured in FBS and stained with anti-FlnA antibody. Note that in the LNCaP cells, FlnA is mostly nuclear (arrow points to region of FlnA staining (green) in the nucleus, while in the C4-2 cells, the staining is mostly cytoplasmic (arrow points to dark nuclei in the center, indicating lack of nuclear FlnA, though the nucleolus appears to stain green). Transfection of FlnA 16-24 restored FlnA nuclear localization in the C4-2 cells (see the green nucleus). **(lower panel)** phase contrast images of the same cells to show the number of cells. Note that FlnA16-24 expression significantly reduces the number of cells.

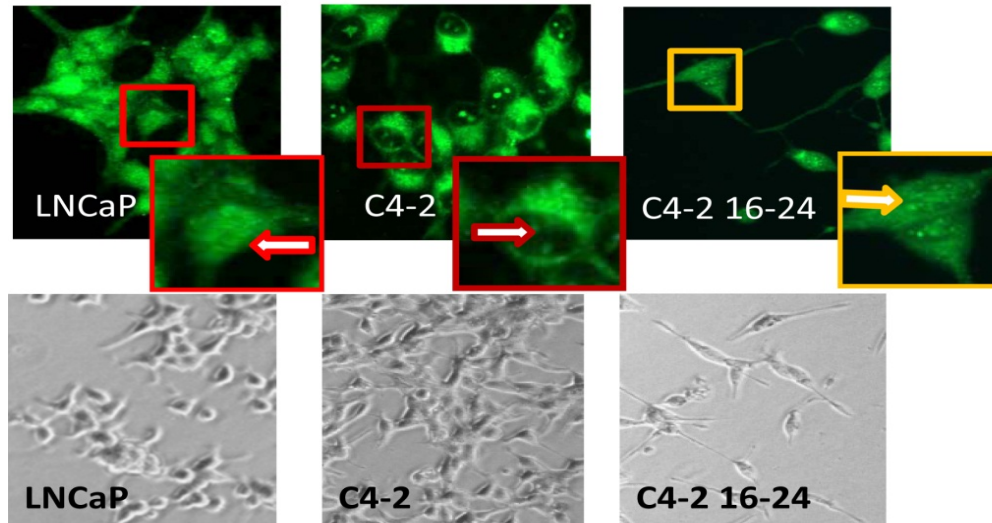

**Supplementary Figure 5. Comparison of the effects of nuclear and cytoplasmic FlnA on Nrdp1 and PSA transcription by the AR and on apoptosis in PCa cells. (A)** FlnA restores AR transcriptional activity on Nrdp1 ARE3 in androgen independent cells. C4-2 cells were cultured in FBS medium and transfected with full-length FlnA, FlnA repeats 1-15, or FlnA repeats 16-24, and AR transcriptional activity was measured by luciferase assay using a reporter construct containing *Nrdp1* ARE3. **(B)** Nuclear FlnA (FlnA16-24) induced AR transcriptional activity is androgen-sensitive whereas that by cytoplasmic FlnA (FlnA1-15) is androgen-resistant. C4-2 cells were grown in FBS or CSS-containing media and transfected with empty vector, FlnA 1-15, or FlnA 16-24. AR transcriptional activities on a PSA promoter construct containing ARE-I and ARE-II was measured by luciferase assay. In both FBS ( $p=0.0015$ ) and CSS-containing media ( $***p<0.0001$ ) FlnA 1-15 increased AR transcriptional activity at the PSA promoter, indicating hormone-insensitive upregulation of AR transcriptional activity, while in cells transfected with FlnA 16-24, AR transcriptional activity was not significantly altered.

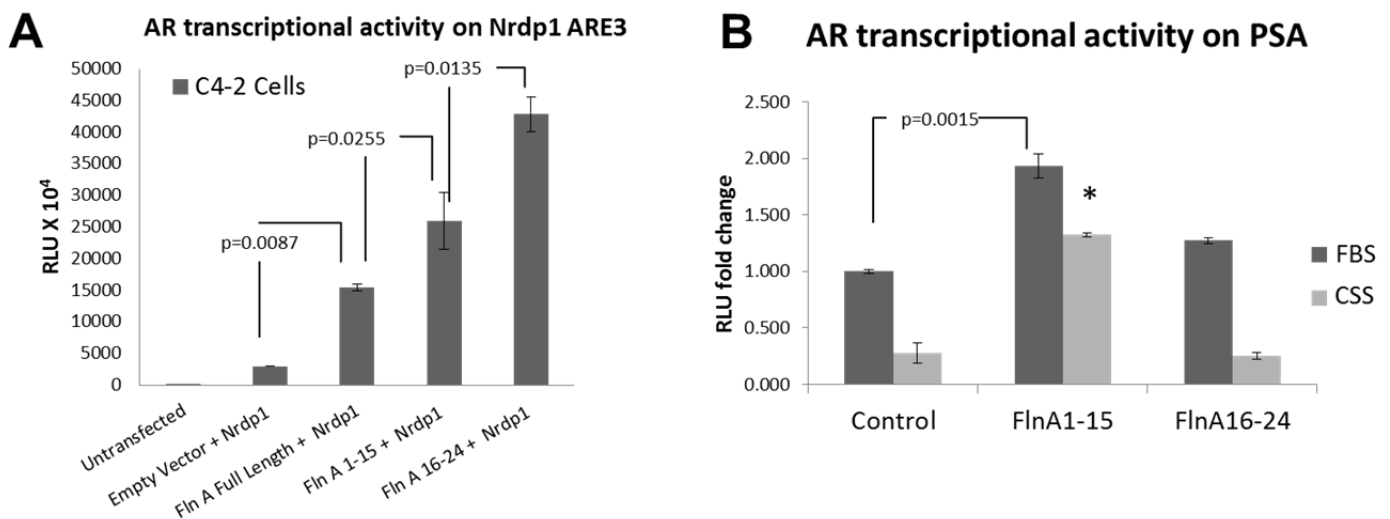



**Supplementary Figure 6. PC-346C cells isolated from a primary prostatectomy specimen responds to bicalutamide in the presence of FlnA 16-24.** The following experiments were conducted in media containing charcoal stripped serum (CSS) as PC-346C cells do not express nuclear FlnA when cultured for prolonged periods in CSS. **(A)** Flow cytometric analysis in Annexin-V/PI-stained PC346C cells to determine the effect of the FlnA isoforms on apoptosis. Cells were cultured in FBS and transfected with either empty vector, full length FlnA, FlnA 1-15, or FlnA 16-24. At the end of 48 hours, the cells were harvested and analyzed for the onset of apoptosis using staining with Annexin V as an indicator of early and propidium iodide (PI) as an indicator of late apoptosis/cell death. Note that full length FlnA and FlnA 1-15 had little to no effect on apoptosis, while FlnA 16-24 increased the rate of apoptosis 3.7 fold (4.28 – 15.89%). **(B)** PC-346C cells were transfected with an empty vector or FlnA 16-24 and cultured for 72 hours in CSS. MTT assay showed that despite the fact that the cells were isolated from a primary tumor, those transfected with the empty vector had little response to 10  $\mu$ M bicalutamide; however, when transfected with FlnA 16-24, the rate of cell growth slowed considerably and the cells significantly responded to the same dose of bicalutamide. **(C)** Cell cycle analysis by flow cytometry of PC-346C cells. The cells were transfected with an empty vector (pCMV) or FlnA 16-24 and treated with DMSO or 10  $\mu$ M bicalutamide for 48 hours, at the end of which they were fixed in cold ethanol, stained with PI and the PI-stained fixed cells subjected to flow cytometry to identify the percentage of cells in each phase of the cell cycle (G1, S and G2/M). A decrease in the percentage of cells in S-phase in this case is an indicator of growth arrest. Note that growth arrest was observed only in cells transfected with FlnA 16-24 and treated with bicalutamide.

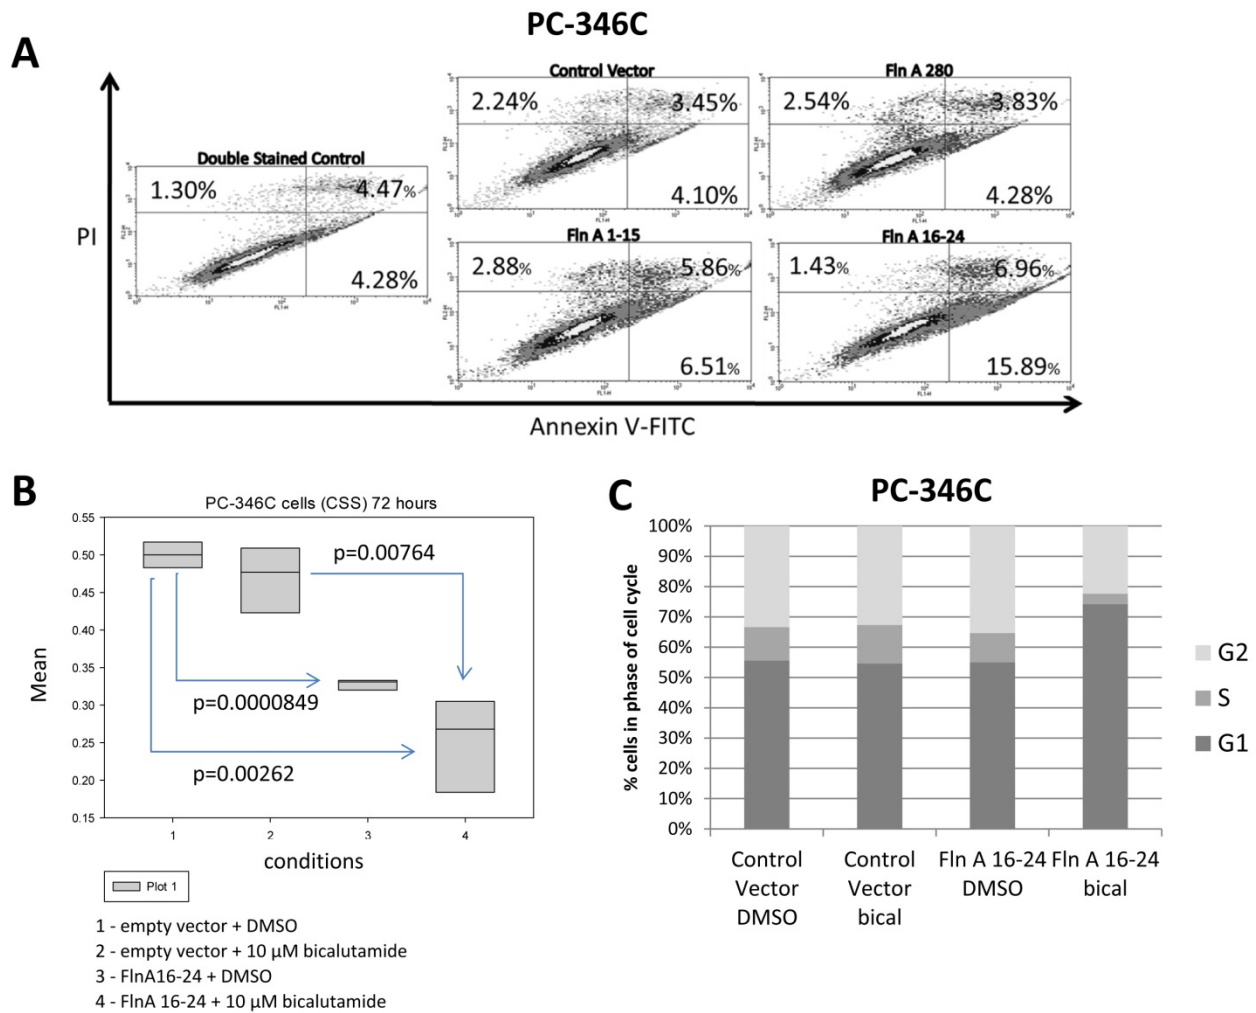

**Supplementary Table 1: Primers used for qPCR**

|         |         |                                 |
|---------|---------|---------------------------------|
| β-Actin | forward | 5'-TCACCCACACTGTGCCCATCTACGA-3' |
|         | reverse | 5'-CAGCGGAACCGCTCATTGCCAATGG-3' |
| Nrdp1   | forward | 5'-ATCGCAGAGCTGGAGAAGACGT-3'    |
|         | reverse | 5'-TGTCTCCTCCAGGTTCTGAAGG-3'    |
| TMPRSS2 | forward | 5'-CCTGCATCAACCCCTCTAACTG-3'    |
|         | reverse | 5'-AGGCGAACACACCGATTCTC-3'      |
| AR      | forward | 5'-GACGACCAGATGGCTGTCATT-3'     |
|         | reverse | 5'-GGGCGAAGTAGAGCATCCT-3'       |
| FlnA    | forward | 5'-GTGAAC TCTGCCCGCTTCTT-3'     |
|         | reverse | 5'-CCCTGCCAGGCATCG-3'           |
| GDF15   | forward | 5'-AGAGATACGCAGGTGCAGGT-3'      |
|         | reverse | 5'-AGCTGGGAAGATTCGAACAC-3'      |
| IL32    | forward | 5'-CCTGAGCAGAAGTAGGGAGG-3'      |
|         | reverse | 5'-TTGGCTCCTTGAACCTTTTGG-3'     |
| BHLHE40 | forward | 5'-GACGGGGAATAAAGCGGAGC-3'      |
|         | reverse | 5'-CCGGTCACGTCTCTTTTCTC-3'      |
| HMOX1   | forward | 5'-AAGACTGCGTTCCTGCTCAAC-3'     |
|         | reverse | 5'-AAAGCCCTACAGCAACTGTCTG-3'    |

**Supplementary Table 2: Primers used for ChIP analysis (AR IP or input):**

|                        |         |                                   |
|------------------------|---------|-----------------------------------|
| Nrdp1 ARE3             | forward | 5'- CAACAATCTGCGTCAGCTCTA-3'      |
|                        | reverse | 5'-GCCAGGACTATGTAGCCATTT-3'       |
| Znf333 (neg control)   | forward | 5'-TGAAGACACATCTGCGAACC-3'        |
|                        | reverse | 5'-TCGCGCACTCATAAGTTTC-3'         |
| ARarfneg (neg control) | forward | 5'- TTGCTGAGTCAAAGGGTGTATATAAG-3' |
|                        | reverse | 5'- GACACACACAAATAATGTATGGAAA-3'  |

**Supplementary Table 3: Androgen response elements identified in FlnA-regulated genes:**

|   | <b>Gene</b> | <b>ARE</b>                             |
|---|-------------|----------------------------------------|
| 1 | IL-32       | CG <b>TACCTT</b> CC <b>TGTA</b> CTCA   |
|   |             | GAG <b>GAGGCT</b> GCG <b>TGTGCT</b> TT |
|   |             | TT <b>TGGCCG</b> CCAT <b>TGTGCT</b> TC |
| 2 | HMOX1       | AT <b>GATTCATACAGTCCT</b> TT           |
|   |             | TCC <b>ATTTCGTTTTGTCCT</b> CT          |
| 3 | GDF15       | CC <b>ATGACCTTCTGTCCT</b> TT           |
|   |             | AG <b>TTTTCATCTTGTCT</b> TG            |
| 4 | BHLHE40     | GG <b>TTTTCTTTCCGTCCT</b> GG           |
| 5 | TMPRSS2     | T <b>CTGGTCAGGCTGTCCT</b> GG           |
|   |             | GAG <b>ATTCTTCTAGTTCT</b> TT           |
